# Supplementary material for: Biology Intensive Orientation for Students (BIOS): A Biology “Boot Camp”
Source: Atypon-hosted journal article supplement (doi:10.1187/cbe.06-08-0184), 2007-06-01
Supplement: appendix_1.pdf [file appendix_1.pdf]

## **Appendix 1**

### **BIOS 2005 Schedule**

#### **Sunday (7 August)**

---

- 4:00-6:00 pm Check-in for students needing housing
- 6:00-7:00 pm Program check-in
- 7:00-9:00 pm Orientation (LSB A101) (with time for focus groups)

#### **Monday (8 August)**

---

##### *Morning*

- 8:00-10:00 Introduction, Content Lecture 1, Basic Chemistry (atomic structure, valence, bonds)
- 10:00-10:30 Break
- 10:30-12:00 Study Skills Discussion 1, Note taking skills, Listening skills and Metacognition

##### *Afternoon*

- 12:00-1:30 Buffet Lunch
- 2:00-3:30 Content Lecture 2, Basic Chemistry II (properties of water, pH, hydrogen bonding)
- 3:30-3:45 Break
- 3:45-5:00 Study Skills Discussion 2, Learning Styles
- 5:00-6:30 Buffet Dinner
- 6:30-7:00 Research Presentation
- 7:00-9:00 Study Hall

#### **Tuesday (9 August)**

---

##### *Morning*

- 8:00-9:00 Exam 1
- 9:00-9:15 Break
- 9:15-10:30 Content Lecture 3, Biological Molecules
- 10:30-12:00 How to be a Student Session 1, What are your responsibilities as a student? (know the rules, go to class, take notes, be prepared, remember that you are the only one who is concerned about your grade)

##### *Afternoon*

- 12:00-1:30 Buffet Lunch
- 2:00-3:30 Discussion of Exam Results
- 3:30-3:45 Break
- 3:45-5:00 How to be a Student Session 2, What is Center for the Freshman Year? (Paul Ivey and/or counselor from UCFY)
- 5:00-6:30 Buffet Dinner
- 6:30-7:00 Research Presentation
- 7:00-9:00 Study Hall

### **Wednesday (10 August)**

---

#### *Morning*

- 8:00-10:00 Content Lecture 4, Biological Molecules II
- 10:00-10:30 Break
- 10:30-12:00 How to be a Student Session 3, What is the College of Basic Sciences?

#### *Afternoon*

- 12:00-1:30 Buffet Lunch
- 2:00-3:30 Content Lecture 5, Chemical Reactions/Enzymes
- 3:30-3:45 Break
- 3:45-5:00 How to be a Student Session 4, How to get help (assistance programs, Dean of Students etc.)
- 5:00-6:30 Buffet Dinner
- 6:30-7:00 Research Presentation
- 7:00-9:00 Study Hall

### **Thursday (11 August)**

---

#### *Morning*

- 8:00-9:00 Exam 2
- 9:00-9:15 Break
- 9:15-10:30 Content Lecture 6, Cell Structures
- 10:30-12:00 How to be a Student Session 5, How do I survive as a student? (Student Health Center)

#### *Afternoon*

- 12:00-1:30 Buffet Lunch
- 2:00-3:30 Discussion of Exam Results
- 3:30-3:45 Break
- 3:45-5:00 Content Lecture 7, Cell Membrane Structure and Function
- 5:00-6:30 Buffet Dinner
- 6:30-7:00 Research Presentation
- 7:00-9:00 Study Hall

### **Friday (12 August)**

---

#### *Morning*

- 8:00-9:00 Exam 3
- 9:00-9:15 Break
- 9:15-11:00 How to be a Student Session 6, What comes after you graduate?
- 11:00-12:00 Discussion Results Exam 3

#### *Afternoon*

- 12:00-1:00 Checkout of dormitory rooms
